# Supplementary material for: Selective light absorber-assisted single nickel atom catalysts for ambient sunlight-driven CO2 methanation
Source: PubMed Central journal article supplement (PMC6541650; doi:10.1038/s41467-019-10304-y), 2019-05-29
Supplement: 41467_2019_10304_MOESM1_ESM.pdf [file 41467_2019_10304_MOESM1_ESM.pdf]

**Selective light absorber-assisted single nickel atom catalysts  
for ambient sunlight-driven CO<sub>2</sub> methanation**

Yaguang Li et al.

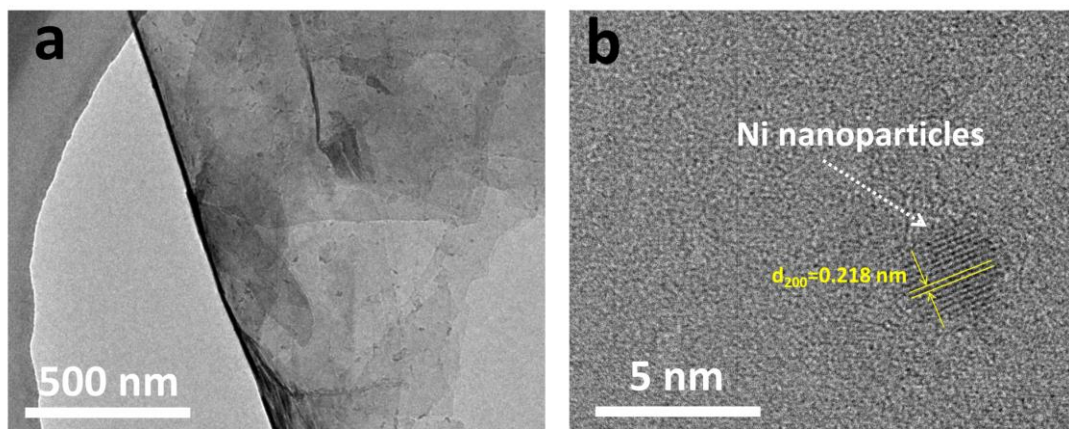

**Supplementary Figure 1.** Characterization of Ni/Y<sub>2</sub>O<sub>3</sub> nanosheets. **a, b** TEM and HRTEM images of Ni/Y<sub>2</sub>O<sub>3</sub> nanosheets.

The TEM image of Ni/Y<sub>2</sub>O<sub>3</sub> nanosheets showed some nanoparticles distributed on the nanosheets (Supplementary Figure 1a) and the HRTEM image revealed the crystalline nature of the nanoparticles with 0.218 nm of lattice spacing, corresponding to the (002) plane of metallic Ni,<sup>1</sup> thus, confirming that the crystalline precipitations on nanosheets are Ni nanoparticles.

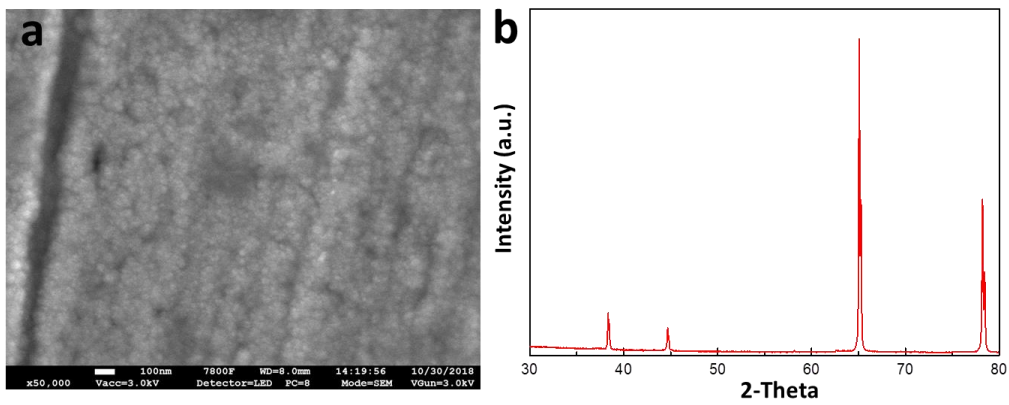

**Supplementary Figure 2.** Characterization of selective light absorber. **a** SEM image and **b** XRD pattern of selective light absorber.

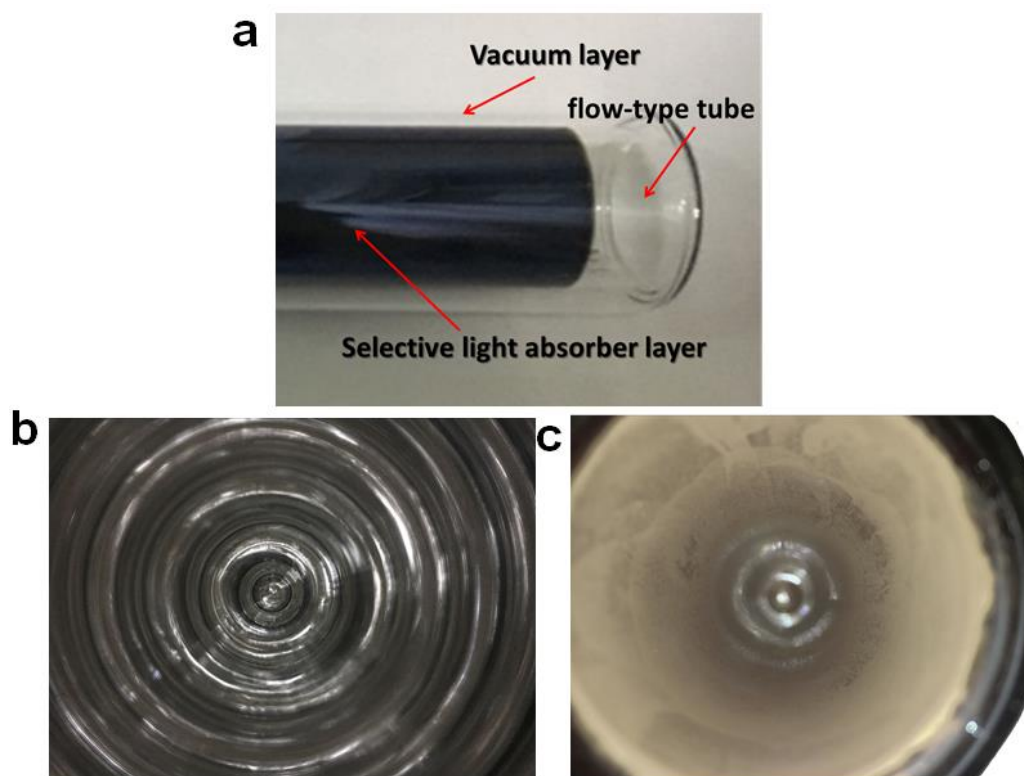

**Supplementary Figure 3.** Characterization of selective light absorber coated quartz tube. **a** Photograph of selective light absorber layer coated on quartz tube. **b, c** Photograph of selective light absorber layer assisted quartz tubes coated without and with catalysts.

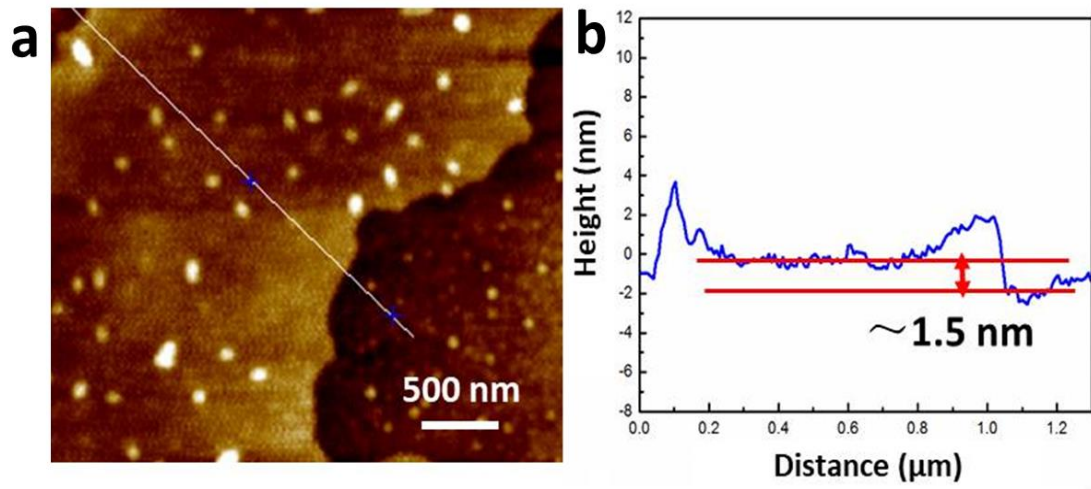

**Supplementary Figure 4.** Characterization of SA Ni/Y<sub>2</sub>O<sub>3</sub> nanosheets. **a** AFM image, **b** height profile of SA Ni/Y<sub>2</sub>O<sub>3</sub> nanosheets.

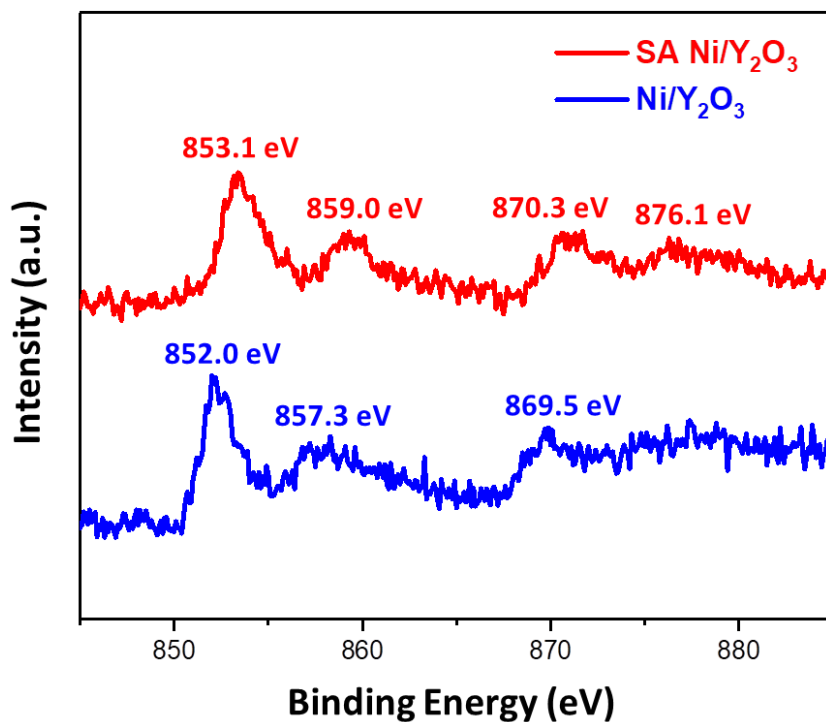

**Supplementary Figure 5.** The Ni 2p XPS spectra of SA Ni/Y<sub>2</sub>O<sub>3</sub> nanosheets (red) and Ni/Y<sub>2</sub>O<sub>3</sub> nanosheets (blue).

The binding energy of Ni 2p<sub>3/2</sub> is 853.1 eV for SA Ni/Y<sub>2</sub>O<sub>3</sub> nanosheets, a little lower than that of NiO (853.7 eV),<sup>1</sup> revealing the oxidation state of Ni in SA Ni/Y<sub>2</sub>O<sub>3</sub> nanosheets. The binding energy of Ni 2p<sub>3/2</sub> is 852.0 eV for Ni/Y<sub>2</sub>O<sub>3</sub> nanosheets, similar to the metallic Ni (852.0 eV),<sup>1</sup> confirming the metallic state of Ni in Ni/Y<sub>2</sub>O<sub>3</sub> nanosheets.

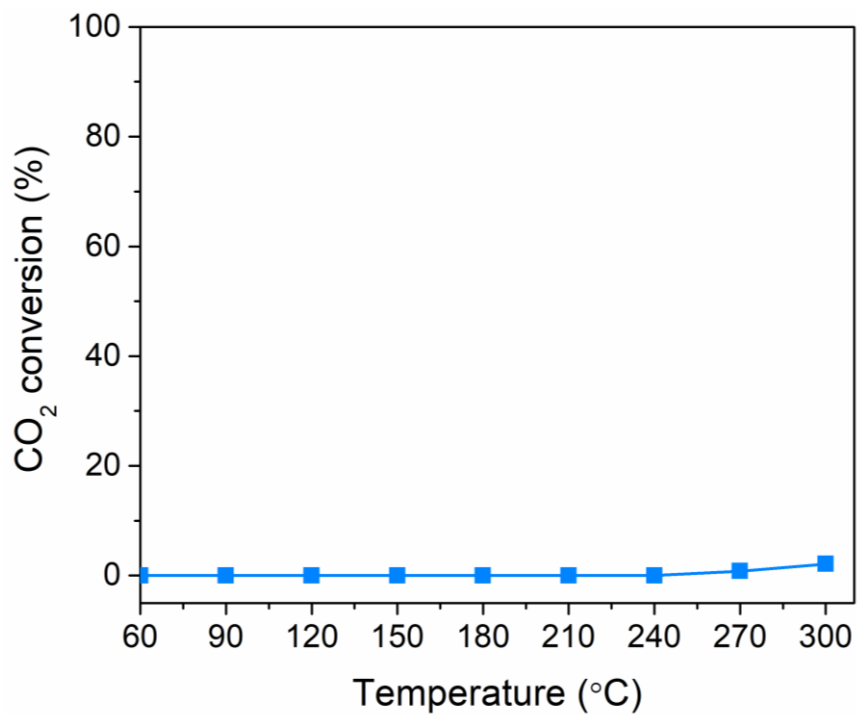

**Supplementary Figure 6.** Thermal CO<sub>2</sub> conversion of Y<sub>2</sub>O<sub>3</sub> nanosheets. Reaction condition: 100 mL min<sup>-1</sup> of reaction gas (2.5% CO<sub>2</sub>+10 % H<sub>2</sub>+ 87.5% N<sub>2</sub>), 100 mg of catalysts.

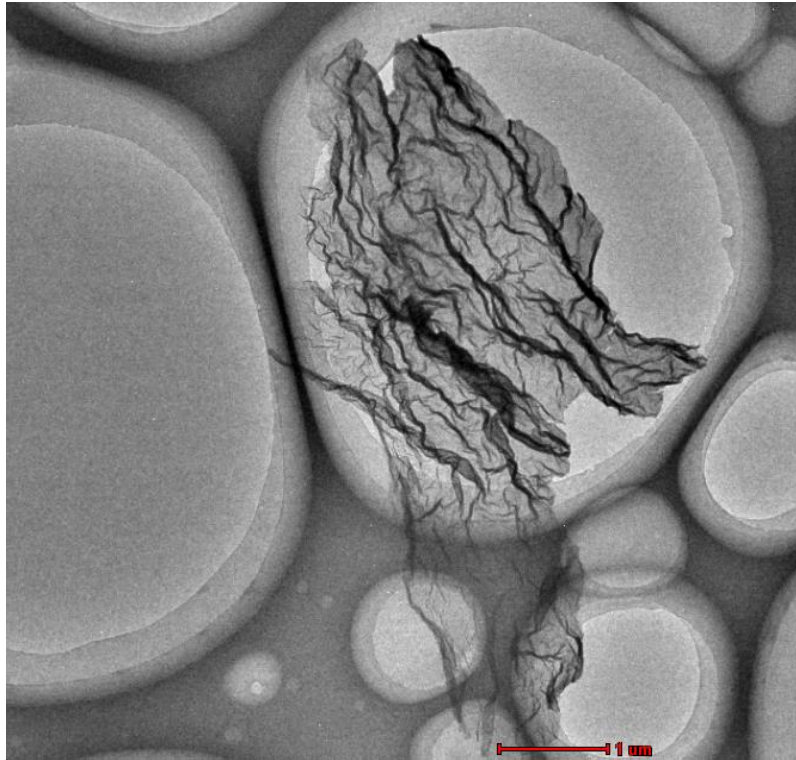

**Supplementary Figure 7.** TEM image of SA Ni/Y<sub>2</sub>O<sub>3</sub> nanosheets after 90 hours' heating/cooling thermal CO<sub>2</sub> methanation test.



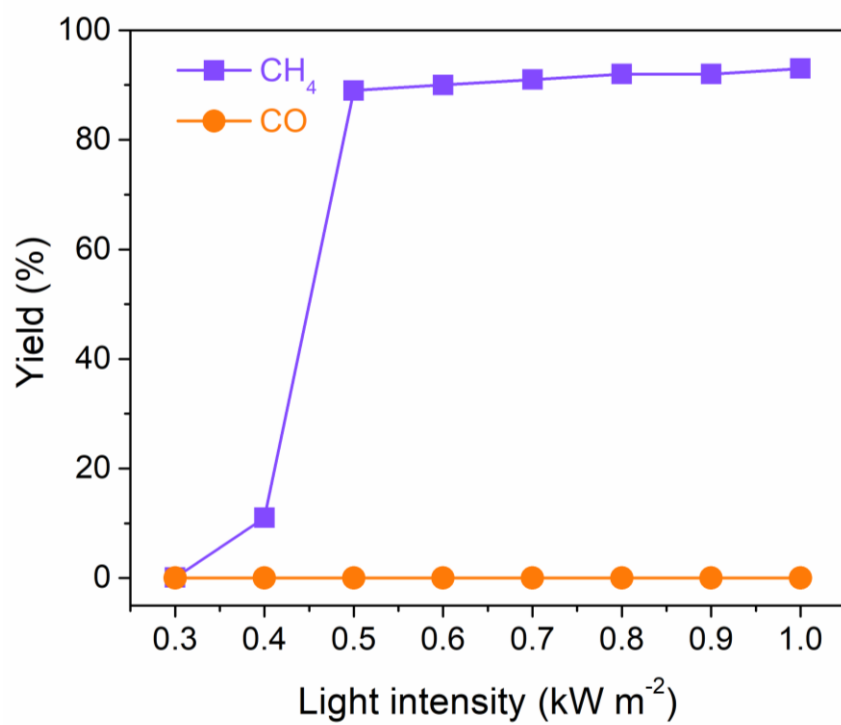

**Supplementary Figure 8.** CH<sub>4</sub> and CO yields in photothermal CO<sub>2</sub> methanation under different densities of solar light irradiation.

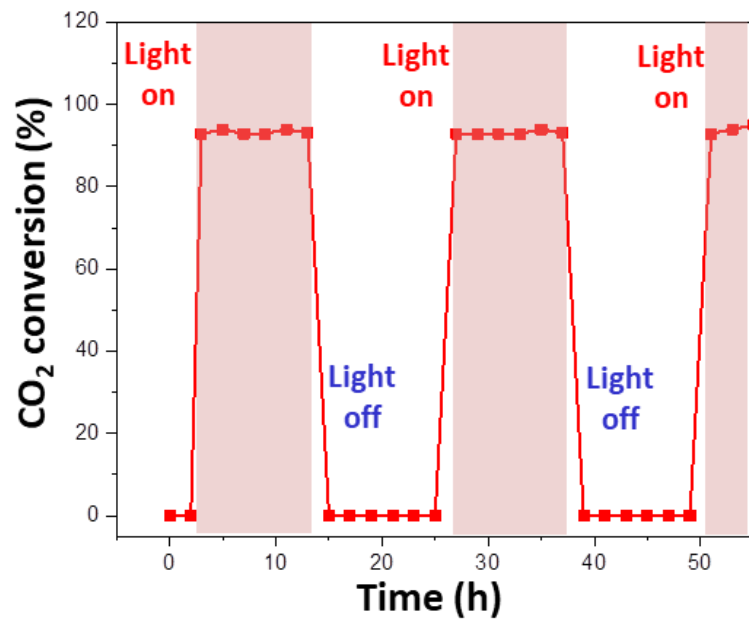

**Supplementary Figure 9.** CO<sub>2</sub> hydrogenation performance versus reaction time, under 1 kW m<sup>-2</sup> of simulated solar light irradiation.

**Supplementary Table 1.** The sunlight-driven temperature of different materials in air and in vacuum respectively. The sunlight intensity is  $1.0 \text{ kW m}^{-2}$ .

| Materials                         | CNT | Graphene | 2wt%<br>Au/Al <sub>2</sub> O <sub>3</sub> | 4wt%<br>Ni/Y <sub>2</sub> O <sub>3</sub> | CuO | 2wt%<br>Ru/Al <sub>2</sub> O <sub>3</sub> | Selective<br>light<br>absorber |
|-----------------------------------|-----|----------|-------------------------------------------|------------------------------------------|-----|-------------------------------------------|--------------------------------|
| Temperature<br>in air ( °C)       | 70  | 79       | 70                                        | 78                                       | 82  | 64                                        | 260                            |
| Temperature<br>in vacuum<br>( °C) | 98  | 86       | 88                                        | 97                                       | 103 | 82                                        | 300                            |

**Supplementary Table 2.** Physicochemical properties of the as-prepared samples.

| Catalysts                                   | Metal loading (wt%) <sup>a</sup> | S <sub>BET</sub> (m <sup>2</sup> g <sup>-1</sup> ) <sup>b</sup> |
|---------------------------------------------|----------------------------------|-----------------------------------------------------------------|
| 3.9 wt% SA Ni/Y <sub>2</sub> O <sub>3</sub> | 3.9                              | 425                                                             |
| Ni/Y <sub>2</sub> O <sub>3</sub>            | 4.0                              | 409                                                             |

a, analyzed by ICP-AES.

b, obtained by N<sub>2</sub> adsorption-desorption method through Brunauer-Emmett-Teller (BET) equation.

**Supplementary Table 3.** The thermal CO<sub>2</sub> methanation performances of different catalysts.

| Catalysts                           | Temperature ( °C) | TOF (CO <sub>2</sub> ) | References |
|-------------------------------------|-------------------|------------------------|------------|
| SA Ni/Y <sub>2</sub> O <sub>3</sub> | 200               | 0.023                  | This work  |
| Ni/Co <sub>3</sub> O <sub>4</sub>   | 200               | 0.003                  | 1          |
| Co NP                               | 200               | 0.005                  | 2          |
| Ni/Al <sub>2</sub> O <sub>3</sub>   | 200               | 0.006                  | 3          |
| Ni/VO <sub>x</sub>                  | 210               | 0.0023                 | 4          |
| Ni/ZrO <sub>2</sub>                 | 235               | 0.058                  | 5          |
| Ni/Al <sub>2</sub> O <sub>3</sub>   | 300               | 5.7                    | 6          |
| Ni/SiO <sub>2</sub>                 | 300               | 1.61                   | 7          |
| Co/ZrO <sub>2</sub>                 | 400               | 0.2                    | 8          |
| NiFe                                | 300               | 5.9                    | 9          |

## References

- 1 Wang, Y., Arandiyan, H., Scott, J., Dai, H. & Amal, R. Hierarchically Porous Network-Like Ni/Co<sub>3</sub>O<sub>4</sub>: Noble Metal-Free Catalysts for Carbon Dioxide Methanation. *Advanced Sustainable Systems* **2**, 1700119 (2018).
- 2 Beaumont, S. K. *et al.* Combining in Situ NEXAFS Spectroscopy and CO<sub>2</sub> Methanation Kinetics To Study Pt and Co Nanoparticle Catalysts Reveals Key Insights into the Role of Platinum in Promoted Cobalt Catalysis. *J. Am. Chem. Soc.* **136**, 9898-9901 (2014).
- 3 Meng, X. *et al.* Photothermal conversion of CO<sub>2</sub> into CH<sub>4</sub> with H<sub>2</sub> over Group VIII nanocatalysts: an alternative approach for solar fuel production. *Angew. Chem. Int. Ed.* **53**, 11478-11482 (2014).
- 4 Lu, X. *et al.* VO<sub>x</sub> promoted Ni catalysts supported on the modified bentonite for CO and CO<sub>2</sub> methanation. *Fuel. Process. Technol.* **135**, 34-46 (2015).
- 5 Jia, X., Zhang, X., Rui, N., Hu, X. & Liu, C.-j. Structural effect of Ni/ZrO<sub>2</sub> catalyst on CO<sub>2</sub> methanation with enhanced activity. *Appl. Catal. B-Environ.* **244**, 159-169 (2019).
- 6 He, L., Lin, Q., Liu, Y. & Huang, Y. Unique catalysis of Ni-Al hydrotalcite derived catalyst in CO<sub>2</sub> methanation: cooperative effect between Ni nanoparticles and a basic support. *J. Energy. Chem.* **23**, 587-592 (2014).
- 7 Aziz, M. A. A. *et al.* Highly active Ni-promoted mesostructured silica nanoparticles for CO<sub>2</sub> methanation. *Appl. Catal. B-Environ.* **147**, 359-368 (2014).
- 8 Li, W. *et al.* ZrO<sub>2</sub> support imparts superior activity and stability of Co catalysts for CO<sub>2</sub> methanation. *Appl. Catal. B-Environ.* **220**, 397-408 (2018).
- 9 Pandey, D. & Deo, G. Effect of support on the catalytic activity of supported Ni-Fe catalysts for the CO<sub>2</sub> methanation reaction. *J. Ind. Eng. Chem.* **33**, 99-107 (2016).
